# Supplementary material for: Polymorph crystal packing effects on charge transfer emission in the solid state
Source: Royal Society of Chemistry journal article supplement (doi:10.1039/c5sc01151e), 2015-01-01
Supplement: c5sc01151e1.pdf [file c5sc01151e1.pdf]

## Supporting Information

Andrew C. Benniston, Xiaoyan He, Hanna Saarenpää, Helge Lemmetyinen, Nikolai Tkachenko and Ulrich Baisch

### Contents

Crystal structure data for **DMIM**

**S1.** Emission spectrum of **DMIM** in chloroform. Excitation wavelength was 330 nm.

**S2.** Excitation spectra of **G-DMIM** and **O-DMIM** recorded with monitoring at 600 and 660 nm, and normalized at 530 nm (**G-DMIM**) and 560 nm (**O-DMIM**).

**S3.** Alteration in fluorescence spectra for **G-DMIM** dispersed in a dry KBr disc with temperature. Insert shows the plot of  $\ln(\text{total intensity})$  vs  $1/T$  with lines drawn to help show the break in dependence at around 417K.

**S4.** Alteration in fluorescence spectra for **O-DMIM** dispersed in a dry KBr disc with temperature. Insert shows the plot of  $\ln(\text{total intensity})$  vs  $1/T$  with lines drawn to help show the break in dependence at around 476K.

**S5.** Room temperature emission decay curves recorded for **G-DMIM** and the least-squares fit to a tri-exponential (red line).

**S6.** Fluorescence microscope images of crystals for **DMIM** deposited on a glass slide after slow solvent evaporation. (top) before excitation, (bottom) after excitation.

**S7.** Emission decay associated spectra of **G-DMIM** (A) and **O-DMIM** (B) normalized to present relative contribution of each component to the steady state emission spectrum. Normalization is done by multiplying each spectra component by the component lifetime,  $\tau_i \cdot A_i(\lambda)$ .

**S8.** Observed electronic absorption spectrum for **DMIM** in cyclohexane (black) and TD-DFT calculated spectrum (red) using B3LYP and a 6-311G<sup>+</sup>(3df) basis set. The shaded bars (a) through (e) represent electronic transitions contributing to the absorption profile. The insert shows the atomic orbitals associated with (a) and the oscillator strength.

**S9.** Selection of atomic orbital associated with the electronic transitions (b) through (e) as shown in S5.

Calculations

Crystals of **DMIM** were grown by slow vapour diffusion method. Data for the two polymorphic crystals are collected in Tables 1 & 2.

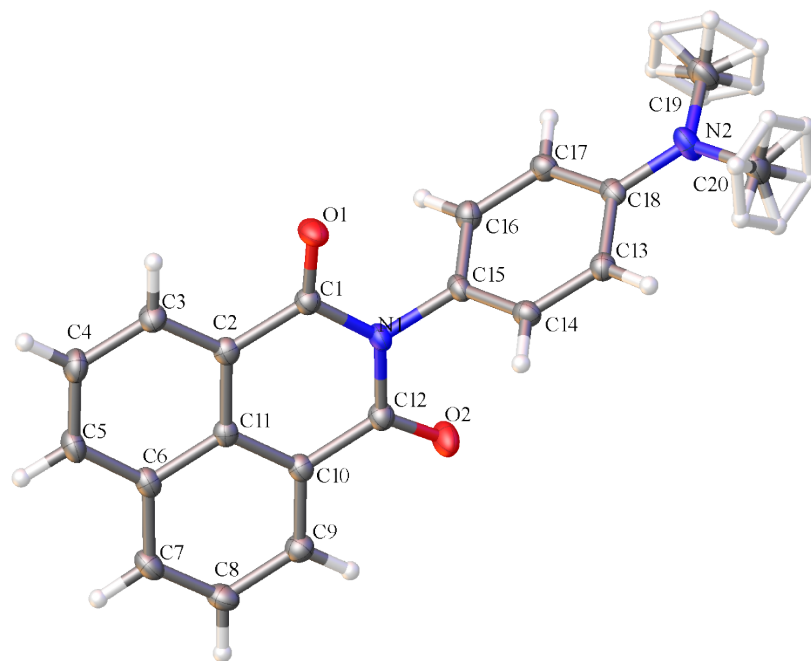

**Table 1. Crystal data and structure refinement for G-DMIM**

|                                       |                                                               |                        |
|---------------------------------------|---------------------------------------------------------------|------------------------|
| Identification code                   | <b>G-DMIM</b>                                                 |                        |
| Chemical formula (moiety)             | C <sub>20</sub> H <sub>16</sub> N <sub>2</sub> O <sub>2</sub> |                        |
| Chemical formula (total)              | C <sub>20</sub> H <sub>16</sub> N <sub>2</sub> O <sub>2</sub> |                        |
| Formula weight                        | 316.35                                                        |                        |
| Temperature                           | 150(2) K                                                      |                        |
| Radiation, wavelength                 | MoK $\alpha$ , 0.71073 Å                                      |                        |
| Crystal system, space group           | triclinic, P $\bar{1}$                                        |                        |
| Unit cell parameters                  | a = 9.4336(8) Å                                               | $\alpha$ = 115.803(9)° |
|                                       | b = 9.5749(8) Å                                               | $\beta$ = 97.324(7)°   |
|                                       | c = 9.9183(9) Å                                               | $\gamma$ = 104.839(7)° |
| Cell volume                           | 749.69(11) Å <sup>3</sup>                                     |                        |
| Z                                     | 2                                                             |                        |
| Calculated density                    | 1.401 g/cm <sup>3</sup>                                       |                        |
| Absorption coefficient $\mu$          | 0.092 mm <sup>-1</sup>                                        |                        |
| F(000)                                | 332                                                           |                        |
| Crystal colour and size               | green, 0.30 × 0.20 × 0.20 mm <sup>3</sup>                     |                        |
| Reflections for cell refinement       | 2145 ( $\theta$ range 3.2 to 28.6°)                           |                        |
| Data collection method                | Xcalibur, Atlas, Gemini ultra<br>thick-slice $\omega$ scans   |                        |
| $\theta$ range for data collection    | 3.2 to 28.6°                                                  |                        |
| Index ranges                          | h -12 to 11, k -9 to 11, l -11 to 12                          |                        |
| Completeness to $\theta = 25.0^\circ$ | 99.8 %                                                        |                        |
| Reflections collected                 | 5582                                                          |                        |
| Independent reflections               | 3090 ( $R_{\text{int}} = 0.0207$ )                            |                        |
| Reflections with $F^2 > 2\sigma$      | 2392                                                          |                        |
| Absorption correction                 | semi-empirical from equivalents                               |                        |
| Min. and max. transmission            | 0.9730 and 0.9819                                             |                        |
| Structure solution                    | direct methods                                                |                        |
| Refinement method                     | Full-matrix least-squares on $F^2$                            |                        |
| Weighting parameters a, b             | 0.0542, 0.2698                                                |                        |
| Data / restraints / parameters        | 3090 / 0 / 218                                                |                        |
| Final R indices [ $F^2 > 2\sigma$ ]   | R1 = 0.0449, wR2 = 0.1109                                     |                        |
| R indices (all data)                  | R1 = 0.0600, wR2 = 0.1255                                     |                        |
| Goodness-of-fit on $F^2$              | 1.029                                                         |                        |
| Extinction coefficient                | 0.014(3)                                                      |                        |
| Largest and mean shift/su             | 0.000                                                         |                        |
| Largest diff. peak and hole           | 0.31 and -0.26 e Å <sup>-3</sup>                              |                        |

**Table 1A Fractional Atomic Coordinates ( $\times 10^4$ ) and Equivalent Isotropic Displacement Parameters ( $\text{\AA}^2 \times 10^3$ ) for G-DMIM.  $U_{\text{eq}}$  is defined as 1/3 of of the trace of the orthogonalised  $U_{ij}$  tensor.**

| Atom | $x$         | $y$        | $z$        | $U(\text{eq})$ |
|------|-------------|------------|------------|----------------|
| O1   | 2545.0(12)  | 6648.7(13) | 2867.9(13) | 26.8(3)        |
| O2   | -1578.1(12) | 2472.8(14) | 2220.9(15) | 30.7(3)        |
| N1   | 476.2(13)   | 4536.1(15) | 2494.6(14) | 18.8(3)        |
| N2   | -3214.8(15) | 8340.5(17) | 2552.0(15) | 25.8(3)        |
| C1   | 2040.8(16)  | 5272.9(18) | 2725.6(17) | 19.1(3)        |
| C2   | 3007.7(16)  | 4285.7(18) | 2759.7(17) | 18.6(3)        |
| C3   | 4557.0(17)  | 4957.9(19) | 3032.1(18) | 21.9(3)        |
| C4   | 5488.7(17)  | 4018(2)    | 3014.1(19) | 24.9(4)        |
| C5   | 4859.0(17)  | 2424(2)    | 2717.8(18) | 24.0(4)        |
| C6   | 3271.2(17)  | 1686.6(19) | 2436.1(17) | 20.5(3)        |
| C7   | 2566.6(18)  | 44.1(19)   | 2126.5(18) | 23.8(3)        |
| C8   | 1026.8(18)  | -610.1(19) | 1872.4(18) | 24.4(4)        |
| C9   | 106.2(17)   | 350.3(19)  | 1922.1(17) | 22.1(3)        |
| C10  | 748.2(16)   | 1948.8(18) | 2215.9(17) | 18.3(3)        |
| C11  | 2335.0(16)  | 2651.4(18) | 2472.6(16) | 17.7(3)        |
| C12  | -232.8(16)  | 2951.7(19) | 2299.9(17) | 20.2(3)        |
| C13  | -2373.1(16) | 6049.0(18) | 1143.3(17) | 20.1(3)        |
| C14  | -1454.7(16) | 5126.8(18) | 1131.2(17) | 20.4(3)        |
| C15  | -481.0(16)  | 5504.5(18) | 2504.9(17) | 18.6(3)        |
| C16  | -436.9(17)  | 6800.8(19) | 3888.3(18) | 21.6(3)        |
| C17  | -1342.4(17) | 7737.1(19) | 3916.8(18) | 21.6(3)        |
| C18  | -2329.9(16) | 7394.5(18) | 2538.7(17) | 18.7(3)        |
| C19  | -3325(2)    | 9573(2)    | 3993(2)    | 31.1(4)        |
| C20  | -4178.4(19) | 8017(2)    | 1118(2)    | 31.1(4)        |

**Table 1B Bond Lengths for G-DMIM.**

| Atom Atom Length/Å |     |            | Atom Atom Length/Å |     |            |
|--------------------|-----|------------|--------------------|-----|------------|
| O1                 | C1  | 1.2172(18) | C6                 | C7  | 1.415(2)   |
| O2                 | C12 | 1.2133(18) | C6                 | C11 | 1.425(2)   |
| N1                 | C1  | 1.4031(19) | C7                 | C8  | 1.367(2)   |
| N1                 | C12 | 1.4066(19) | C8                 | C9  | 1.408(2)   |
| N1                 | C15 | 1.4486(17) | C9                 | C10 | 1.373(2)   |
| N2                 | C18 | 1.3773(18) | C10                | C11 | 1.413(2)   |
| N2                 | C19 | 1.441(2)   | C10                | C12 | 1.4801(19) |
| N2                 | C20 | 1.444(2)   | C13                | C14 | 1.384(2)   |
| C1                 | C2  | 1.479(2)   | C13                | C18 | 1.408(2)   |
| C2                 | C3  | 1.375(2)   | C14                | C15 | 1.383(2)   |
| C2                 | C11 | 1.411(2)   | C15                | C16 | 1.379(2)   |
| C3                 | C4  | 1.407(2)   | C16                | C17 | 1.382(2)   |
| C4                 | C5  | 1.367(2)   | C17                | C18 | 1.404(2)   |
| C5                 | C6  | 1.414(2)   |                    |     |            |

**Table 1C Bond Angles for G-DMIM.**

| Atom Atom Atom Angle/° |    |     |            | Atom Atom Atom Angle/° |     |     |            |
|------------------------|----|-----|------------|------------------------|-----|-----|------------|
| C1                     | N1 | C12 | 125.32(12) | C10                    | C9  | C8  | 120.19(14) |
| C1                     | N1 | C15 | 117.39(12) | C9                     | C10 | C11 | 120.65(13) |
| C12                    | N1 | C15 | 117.27(12) | C9                     | C10 | C12 | 119.40(13) |
| C18                    | N2 | C19 | 121.35(13) | C11                    | C10 | C12 | 119.94(13) |
| C18                    | N2 | C20 | 120.73(13) | C2                     | C11 | C6  | 119.47(13) |
| C19                    | N2 | C20 | 117.66(13) | C2                     | C11 | C10 | 121.26(13) |
| O1                     | C1 | N1  | 120.41(13) | C10                    | C11 | C6  | 119.27(13) |
| O1                     | C1 | C2  | 122.94(13) | O2                     | C12 | N1  | 120.25(13) |
| N1                     | C1 | C2  | 116.64(12) | O2                     | C12 | C10 | 123.25(14) |
| C3                     | C2 | C1  | 119.50(13) | N1                     | C12 | C10 | 116.50(12) |
| C3                     | C2 | C11 | 120.45(13) | C14                    | C13 | C18 | 121.20(14) |
| C11                    | C2 | C1  | 120.03(13) | C15                    | C14 | C13 | 120.24(14) |
| C2                     | C3 | C4  | 120.34(14) | C14                    | C15 | N1  | 120.30(13) |
| C5                     | C4 | C3  | 120.22(14) | C16                    | C15 | N1  | 120.14(13) |
| C4                     | C5 | C6  | 121.27(14) | C16                    | C15 | C14 | 119.56(13) |
| C5                     | C6 | C7  | 123.37(14) | C15                    | C16 | C17 | 120.82(14) |
| C5                     | C6 | C11 | 118.24(14) | C16                    | C17 | C18 | 120.91(14) |
| C7                     | C6 | C11 | 118.38(13) | N2                     | C18 | C13 | 121.42(13) |
| C8                     | C7 | C6  | 121.20(14) | N2                     | C18 | C17 | 121.32(13) |
| C7                     | C8 | C9  | 120.30(14) | C17                    | C18 | C13 | 117.26(13) |

**Table 1D Torsion Angles for G-DMIM.**

| <b>A</b> | <b>B</b> | <b>C</b> | <b>D</b> | <b>Angle/°</b> | <b>A</b> | <b>B</b> | <b>C</b> | <b>D</b> | <b>Angle/°</b> |
|----------|----------|----------|----------|----------------|----------|----------|----------|----------|----------------|
| O1       | C1       | C2       | C3       | 3.0(2)         | C9       | C10      | C12      | O2       | 4.9(2)         |
| O1       | C1       | C2       | C11      | -175.29(13)    | C9       | C10      | C12      | N1       | -175.66(13)    |
| N1       | C1       | C2       | C3       | -177.90(13)    | C11      | C2       | C3       | C4       | 0.6(2)         |
| N1       | C1       | C2       | C11      | 3.8(2)         | C11      | C6       | C7       | C8       | -0.2(2)        |
| N1       | C15      | C16      | C17      | 179.94(13)     | C11      | C10      | C12      | O2       | -173.65(14)    |
| C1       | N1       | C12      | O2       | 174.59(14)     | C11      | C10      | C12      | N1       | 5.8(2)         |
| C1       | N1       | C12      | C10      | -4.9(2)        | C12      | N1       | C1       | O1       | 179.30(13)     |
| C1       | N1       | C15      | C14      | 106.90(16)     | C12      | N1       | C1       | C2       | 0.2(2)         |
| C1       | N1       | C15      | C16      | -73.70(18)     | C12      | N1       | C15      | C14      | -74.94(17)     |
| C1       | C2       | C3       | C4       | -177.74(13)    | C12      | N1       | C15      | C16      | 104.46(16)     |
| C1       | C2       | C11      | C6       | 177.06(13)     | C12      | C10      | C11      | C2       | -2.1(2)        |
| C1       | C2       | C11      | C10      | -2.8(2)        | C12      | C10      | C11      | C6       | 178.04(13)     |
| C2       | C3       | C4       | C5       | 0.3(2)         | C13      | C14      | C15      | N1       | 179.75(13)     |
| C3       | C2       | C11      | C6       | -1.2(2)        | C13      | C14      | C15      | C16      | 0.3(2)         |
| C3       | C2       | C11      | C10      | 178.93(13)     | C14      | C13      | C18      | N2       | 178.43(13)     |
| C3       | C4       | C5       | C6       | -0.5(2)        | C14      | C13      | C18      | C17      | -1.3(2)        |
| C4       | C5       | C6       | C7       | -179.91(15)    | C14      | C15      | C16      | C17      | -0.7(2)        |
| C4       | C5       | C6       | C11      | -0.2(2)        | C15      | N1       | C1       | O1       | -2.7(2)        |
| C5       | C6       | C7       | C8       | 179.52(15)     | C15      | N1       | C1       | C2       | 178.19(12)     |
| C5       | C6       | C11      | C2       | 1.0(2)         | C15      | N1       | C12      | O2       | -3.4(2)        |
| C5       | C6       | C11      | C10      | -179.14(13)    | C15      | N1       | C12      | C10      | 177.13(12)     |
| C6       | C7       | C8       | C9       | -0.3(2)        | C15      | C16      | C17      | C18      | 0.0(2)         |
| C7       | C6       | C11      | C2       | -179.22(13)    | C16      | C17      | C18      | N2       | -178.74(14)    |
| C7       | C6       | C11      | C10      | 0.6(2)         | C16      | C17      | C18      | C13      | 1.0(2)         |
| C7       | C8       | C9       | C10      | 0.5(2)         | C18      | C13      | C14      | C15      | 0.7(2)         |
| C8       | C9       | C10      | C11      | 0.0(2)         | C19      | N2       | C18      | C13      | 171.67(14)     |
| C8       | C9       | C10      | C12      | -178.58(13)    | C19      | N2       | C18      | C17      | -8.6(2)        |
| C9       | C10      | C11      | C2       | 179.34(13)     | C20      | N2       | C18      | C13      | -2.3(2)        |
| C9       | C10      | C11      | C6       | -0.5(2)        | C20      | N2       | C18      | C17      | 177.42(14)     |

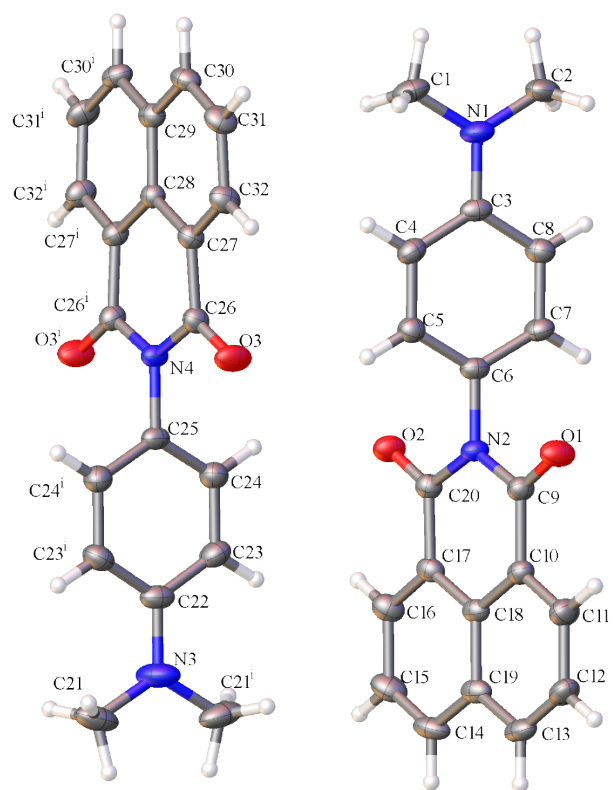

**Table 2. Crystal data and structure refinement for O-DMIM.**

|                                      |                                                               |                |
|--------------------------------------|---------------------------------------------------------------|----------------|
| Identification code                  | <b>O-DMIM</b>                                                 |                |
| Chemical formula (moiety)            | C <sub>20</sub> H <sub>16</sub> N <sub>2</sub> O <sub>2</sub> |                |
| Chemical formula (total)             | C <sub>20</sub> H <sub>16</sub> N <sub>2</sub> O <sub>2</sub> |                |
| Formula weight                       | 949.04                                                        |                |
| Temperature                          | 150(2) K                                                      |                |
| Radiation, wavelength                | Mo-K <sub>α</sub> , 0.71073 Å                                 |                |
| Crystal system, space group          | monoclinic, C2/c                                              |                |
| Unit cell parameters                 | a = 17.3700(9) Å                                              | α = 90°        |
|                                      | b = 29.0684(13) Å                                             | β = 94.498(4)° |
|                                      | c = 8.8805(4) Å                                               | γ = 90°        |
| Cell volume                          | 4470.1(4) Å <sup>3</sup>                                      |                |
| Z                                    | 12                                                            |                |
| Calculated density                   | 1.410 g/cm <sup>3</sup>                                       |                |
| Absorption coefficient μ             | 0.092 mm <sup>-1</sup>                                        |                |
| F(000)                               | 1992                                                          |                |
| Crystal colour and size              | orange, 0.20 × 0.08 × 0.08 mm <sup>3</sup>                    |                |
| Reflections for cell refinement      | 5796 (θ range 3.3 to 28.5°)                                   |                |
| Data collection method               | Xcalibur, Atlas, Gemini ultra<br>thick-slice ω scans          |                |
| θ range for data collection          | 3.3 to 28.6°                                                  |                |
| Index ranges                         | h -23 to 22, k -39 to 38, l -10 to 11                         |                |
| Completeness to θ = 26.0°            | 99.4 %                                                        |                |
| Reflections collected                | 23905                                                         |                |
| Independent reflections              | 5091 (R <sub>int</sub> = 0.0278)                              |                |
| Reflections with F <sup>2</sup> >2σ  | 3685                                                          |                |
| Absorption correction                | semi-empirical from equivalents                               |                |
| Min. and max. transmission           | 0.9818 and 0.9926                                             |                |
| Structure solution                   | direct methods                                                |                |
| Refinement method                    | Full-matrix least-squares on F <sup>2</sup>                   |                |
| Weighting parameters a, b            | 0.0588, 1.9423                                                |                |
| Data / restraints / parameters       | 5091 / 0 / 331                                                |                |
| Final R indices [F <sup>2</sup> >2σ] | R1 = 0.0429, wR2 = 0.1098                                     |                |
| R indices (all data)                 | R1 = 0.0653, wR2 = 0.1247                                     |                |
| Goodness-of-fit on F <sup>2</sup>    | 1.029                                                         |                |
| Largest and mean shift/su            | 0.001 and 0.000                                               |                |
| Largest diff. peak and hole          | 0.19 and -0.24 e Å <sup>-3</sup>                              |                |



**Table 2B Fractional Atomic Coordinates ( $\times 10^4$ ) and Equivalent Isotropic Displacement Parameters ( $\text{\AA}^2 \times 10^3$ ) for O-DMIM (acb134).  $U_{\text{eq}}$  is defined as 1/3 of the trace of the orthogonalised  $U_{ij}$  tensor.**

| Atom | <i>x</i>   | <i>y</i>  | <i>z</i>   | $U(\text{eq})$ |
|------|------------|-----------|------------|----------------|
| N1   | 8248.5(7)  | 7858.4(4) | 6671.2(12) | 30.7(3)        |
| N2   | 8186.9(6)  | 5924.8(3) | 6664.3(11) | 22.3(2)        |
| N3   | 5000       | 4587.7(6) | 7500       | 46.0(5)        |
| N4   | 5000       | 6525.3(5) | 7500       | 22.6(3)        |
| O1   | 9158.7(6)  | 5921.1(3) | 8538.8(10) | 33.6(2)        |
| O2   | 7189.2(5)  | 5923.1(3) | 4845.4(10) | 30.2(2)        |
| O3   | 5934.0(6)  | 6525.9(3) | 9440.4(10) | 35.8(3)        |
| C1   | 7618.6(9)  | 8116.7(5) | 7221.5(17) | 35.6(3)        |
| C2   | 8874.1(9)  | 8102.1(4) | 6048.0(18) | 36.6(3)        |
| C3   | 8227.0(8)  | 7385.7(4) | 6648.3(13) | 24.6(3)        |
| C4   | 7604.3(8)  | 7144.1(4) | 7183.4(14) | 26.8(3)        |
| C5   | 7593.5(7)  | 6666.7(4) | 7186.8(14) | 25.0(3)        |
| C6   | 8195.5(7)  | 6422.2(4) | 6657.8(13) | 22.9(3)        |
| C7   | 8819.5(8)  | 6651.6(4) | 6140.8(14) | 26.2(3)        |
| C8   | 8836.6(8)  | 7128.4(4) | 6131.3(14) | 27.0(3)        |
| C9   | 8720.6(7)  | 5700.8(4) | 7682.3(14) | 23.8(3)        |
| C10  | 8710.9(7)  | 5193.3(4) | 7651.8(14) | 23.6(3)        |
| C11  | 9216.3(8)  | 4957.3(5) | 8627.1(15) | 31.4(3)        |
| C12  | 9209.7(8)  | 4473.8(5) | 8668.5(16) | 33.0(3)        |
| C13  | 8696.7(8)  | 4235.3(4) | 7727.7(15) | 30.7(3)        |
| C14  | 7645.6(9)  | 4232.5(5) | 5659.4(15) | 32.5(3)        |
| C15  | 7148.0(9)  | 4470.3(5) | 4684.5(15) | 34.4(3)        |
| C16  | 7148.7(8)  | 4955.2(5) | 4684.5(14) | 29.7(3)        |
| C17  | 7653.2(7)  | 5192.7(4) | 5662.1(13) | 23.5(3)        |
| C18  | 8180.5(7)  | 4953.4(4) | 6660.9(13) | 22.4(3)        |
| C19  | 8175.8(8)  | 4464.5(4) | 6680.2(14) | 26.5(3)        |
| C20  | 7643.4(7)  | 5700.4(4) | 5661.1(13) | 22.4(3)        |
| C21  | 4419.9(10) | 4335.7(5) | 8239.8(19) | 47.3(4)        |
| C22  | 5000       | 5061.1(6) | 7500       | 30.0(4)        |
| C23  | 5540.4(8)  | 5311.4(5) | 6742.6(16) | 31.8(3)        |
| C24  | 5536.2(8)  | 5789.2(4) | 6740.0(15) | 28.9(3)        |
| C25  | 5000       | 6025.8(6) | 7500       | 24.1(4)        |
| C26  | 5500.0(7)  | 6748.8(4) | 8586.2(13) | 23.9(3)        |
| C27  | 5462.8(7)  | 7255.9(4) | 8617.5(13) | 22.9(3)        |
| C28  | 5000       | 7496.0(6) | 7500       | 20.7(4)        |
| C29  | 5000       | 7984.2(6) | 7500       | 23.9(4)        |
| C30  | 5432.0(8)  | 8215.2(4) | 8686.5(14) | 27.2(3)        |
| C31  | 5860.3(8)  | 7977.6(5) | 9780.2(15) | 30.9(3)        |
| C32  | 5888.1(8)  | 7493.6(5) | 9734.4(15) | 28.6(3)        |

**Table 2C Bond Lengths for O-DMIM (acb134).**

| Atom | Atom             | Length/Å   | Atom | Atom             | Length/Å   |
|------|------------------|------------|------|------------------|------------|
| N1   | C1               | 1.4433(18) | C11  | C12              | 1.4058(18) |
| N1   | C2               | 1.4433(19) | C12  | C13              | 1.362(2)   |
| N1   | C3               | 1.3750(16) | C13  | C19              | 1.4126(18) |
| N2   | C6               | 1.4460(15) | C14  | C15              | 1.363(2)   |
| N2   | C9               | 1.4034(15) | C14  | C19              | 1.4120(18) |
| N2   | C20              | 1.4065(15) | C15  | C16              | 1.4095(19) |
| N3   | C21 <sup>1</sup> | 1.4449(18) | C16  | C17              | 1.3708(17) |
| N3   | C21              | 1.4448(18) | C17  | C18              | 1.4078(17) |
| N3   | C22              | 1.376(2)   | C17  | C20              | 1.4760(17) |
| N4   | C25              | 1.452(2)   | C18  | C19              | 1.4213(17) |
| N4   | C26              | 1.4054(13) | C22  | C23              | 1.4007(17) |
| N4   | C26 <sup>1</sup> | 1.4055(13) | C22  | C23 <sup>1</sup> | 1.4007(17) |
| O1   | C9               | 1.2154(14) | C23  | C24              | 1.3889(18) |
| O2   | C20              | 1.2152(14) | C24  | C25              | 1.3765(16) |
| O3   | C26              | 1.2139(14) | C25  | C24 <sup>1</sup> | 1.3765(16) |
| C3   | C4               | 1.4033(19) | C26  | C27              | 1.4758(17) |
| C3   | C8               | 1.4026(18) | C27  | C28              | 1.4118(14) |
| C4   | C5               | 1.3881(17) | C27  | C32              | 1.3756(17) |
| C5   | C6               | 1.3770(18) | C28  | C27 <sup>1</sup> | 1.4118(14) |
| C6   | C7               | 1.3815(18) | C28  | C29              | 1.419(2)   |
| C7   | C8               | 1.3862(17) | C29  | C30 <sup>1</sup> | 1.4143(15) |
| C9   | C10              | 1.4753(17) | C29  | C30              | 1.4143(15) |
| C10  | C11              | 1.3683(17) | C30  | C31              | 1.3640(18) |
| C10  | C18              | 1.4081(17) | C31  | C32              | 1.4084(18) |

<sup>1</sup>1-X,+Y,3/2-Z

**Table 2D Bond Angles for O-DMIM (acb134).**

| Atom             | Atom | Atom             | Angle/°    | Atom             | Atom | Atom             | Angle/°    |
|------------------|------|------------------|------------|------------------|------|------------------|------------|
| C1               | N1   | C2               | 119.22(11) | C16              | C17  | C20              | 119.76(11) |
| C3               | N1   | C1               | 120.29(12) | C18              | C17  | C20              | 120.09(11) |
| C3               | N1   | C2               | 120.34(11) | C10              | C18  | C19              | 119.46(11) |
| C9               | N2   | C6               | 117.39(9)  | C17              | C18  | C10              | 120.69(11) |
| C9               | N2   | C20              | 124.71(10) | C17              | C18  | C19              | 119.84(11) |
| C20              | N2   | C6               | 117.89(9)  | C13              | C19  | C18              | 118.39(11) |
| C21              | N3   | C21 <sup>1</sup> | 119.06(18) | C14              | C19  | C13              | 123.33(12) |
| C22              | N3   | C21              | 120.47(9)  | C14              | C19  | C18              | 118.28(11) |
| C22              | N3   | C21 <sup>1</sup> | 120.47(9)  | N2               | C20  | C17              | 117.14(10) |
| C26 <sup>1</sup> | N4   | C25              | 117.53(7)  | O2               | C20  | N2               | 120.18(11) |
| C26              | N4   | C25              | 117.53(7)  | O2               | C20  | C17              | 122.68(11) |
| C26              | N4   | C26 <sup>1</sup> | 124.94(14) | N3               | C22  | C23              | 121.30(8)  |
| N1               | C3   | C4               | 121.05(12) | N3               | C22  | C23 <sup>1</sup> | 121.30(8)  |
| N1               | C3   | C8               | 121.17(12) | C23              | C22  | C23 <sup>1</sup> | 117.40(17) |
| C8               | C3   | C4               | 117.76(11) | C24              | C23  | C22              | 121.11(13) |
| C5               | C4   | C3               | 120.79(12) | C25              | C24  | C23              | 120.17(13) |
| C6               | C5   | C4               | 120.29(12) | C24 <sup>1</sup> | C25  | N4               | 119.98(8)  |
| C5               | C6   | N2               | 120.42(11) | C24              | C25  | N4               | 119.98(8)  |
| C5               | C6   | C7               | 120.07(12) | C24              | C25  | C24 <sup>1</sup> | 120.04(17) |
| C7               | C6   | N2               | 119.51(11) | N4               | C26  | C27              | 116.68(10) |
| C6               | C7   | C8               | 120.15(12) | O3               | C26  | N4               | 120.15(11) |
| C7               | C8   | C3               | 120.93(12) | O3               | C26  | C27              | 123.17(11) |
| N2               | C9   | C10              | 116.50(10) | C28              | C27  | C26              | 120.26(11) |
| O1               | C9   | N2               | 120.54(11) | C32              | C27  | C26              | 119.57(11) |
| O1               | C9   | C10              | 122.96(11) | C32              | C27  | C28              | 120.16(12) |
| C11              | C10  | C9               | 118.95(11) | C27              | C28  | C27 <sup>1</sup> | 120.73(15) |
| C11              | C10  | C18              | 120.20(12) | C27              | C28  | C29              | 119.63(8)  |
| C18              | C10  | C9               | 120.84(11) | C27 <sup>1</sup> | C28  | C29              | 119.64(8)  |
| C10              | C11  | C12              | 120.78(12) | C30 <sup>1</sup> | C29  | C28              | 118.34(8)  |
| C13              | C12  | C11              | 119.93(12) | C30              | C29  | C28              | 118.35(8)  |
| C12              | C13  | C19              | 121.21(12) | C30 <sup>1</sup> | C29  | C30              | 123.31(16) |
| C15              | C14  | C19              | 120.99(12) | C31              | C30  | C29              | 121.19(12) |
| C14              | C15  | C16              | 120.45(12) | C30              | C31  | C32              | 120.22(11) |
| C17              | C16  | C15              | 120.27(12) | C27              | C32  | C31              | 120.33(12) |
| C16              | C17  | C18              | 120.14(12) |                  |      |                  |            |

<sup>1</sup>1-X,+Y,3/2-Z

**Table 2E Torsion Angles for O-DMIM (acb134).**

| A   | B   | C   | D   | Angle/°     | A                | B   | C   | D                | Angle/°     |
|-----|-----|-----|-----|-------------|------------------|-----|-----|------------------|-------------|
| N1  | C3  | C4  | C5  | -178.64(11) | C16              | C17 | C18 | C10              | 178.86(12)  |
| N1  | C3  | C8  | C7  | 178.61(11)  | C16              | C17 | C18 | C19              | -1.56(18)   |
| N2  | C6  | C7  | C8  | -179.85(11) | C16              | C17 | C20 | N2               | -178.53(11) |
| N2  | C9  | C10 | C11 | -179.62(11) | C16              | C17 | C20 | O2               | 1.81(19)    |
| N2  | C9  | C10 | C18 | -0.99(17)   | C17              | C18 | C19 | C13              | -178.12(11) |
| N3  | C22 | C23 | C24 | 179.72(9)   | C17              | C18 | C19 | C14              | 1.33(18)    |
| N4  | C26 | C27 | C28 | -6.18(16)   | C18              | C10 | C11 | C12              | -0.7(2)     |
| N4  | C26 | C27 | C32 | 174.46(11)  | C18              | C17 | C20 | N2               | 1.29(17)    |
| O1  | C9  | C10 | C11 | 0.0(2)      | C18              | C17 | C20 | O2               | -178.36(12) |
| O1  | C9  | C10 | C18 | 178.59(12)  | C19              | C14 | C15 | C16              | -0.5(2)     |
| O3  | C26 | C27 | C28 | 173.85(11)  | C20              | N2  | C6  | C5               | 69.14(14)   |
| O3  | C26 | C27 | C32 | -5.5(2)     | C20              | N2  | C6  | C7               | -111.99(13) |
| C1  | N1  | C3  | C4  | -1.28(17)   | C20              | N2  | C9  | O1               | -178.15(12) |
| C1  | N1  | C3  | C8  | -179.39(11) | C20              | N2  | C9  | C10              | 1.43(17)    |
| C2  | N1  | C3  | C4  | -176.92(11) | C20              | C17 | C18 | C10              | -0.96(18)   |
| C2  | N1  | C3  | C8  | 4.97(17)    | C20              | C17 | C18 | C19              | 178.61(11)  |
| C3  | C4  | C5  | C6  | -0.22(18)   | C21              | N3  | C22 | C23              | -177.66(9)  |
| C4  | C3  | C8  | C7  | 0.44(17)    | C21 <sup>1</sup> | N3  | C22 | C23              | 2.34(9)     |
| C4  | C5  | C6  | N2  | 179.81(10)  | C21 <sup>1</sup> | N3  | C22 | C23 <sup>1</sup> | -177.66(9)  |
| C4  | C5  | C6  | C7  | 0.95(17)    | C21              | N3  | C22 | C23 <sup>1</sup> | 2.34(9)     |
| C5  | C6  | C7  | C8  | -0.97(18)   | C22              | C23 | C24 | C25              | 0.56(18)    |
| C6  | N2  | C9  | O1  | 1.43(18)    | C23 <sup>1</sup> | C22 | C23 | C24              | -0.28(9)    |
| C6  | N2  | C9  | C10 | -178.98(11) | C23              | C24 | C25 | N4               | 179.72(9)   |
| C6  | N2  | C20 | O2  | -1.51(17)   | C23              | C24 | C25 | C24 <sup>1</sup> | -0.28(9)    |
| C6  | N2  | C20 | C17 | 178.83(10)  | C25              | N4  | C26 | O3               | 2.98(14)    |
| C6  | C7  | C8  | C3  | 0.27(18)    | C25              | N4  | C26 | C27              | -176.99(8)  |
| C8  | C3  | C4  | C5  | -0.47(17)   | C26              | N4  | C25 | C24 <sup>1</sup> | 95.15(9)    |
| C9  | N2  | C6  | C5  | -110.47(13) | C26 <sup>1</sup> | N4  | C25 | C24 <sup>1</sup> | -84.85(9)   |
| C9  | N2  | C6  | C7  | 68.40(15)   | C26              | N4  | C25 | C24              | -84.85(9)   |
| C9  | N2  | C20 | O2  | 178.07(11)  | C26 <sup>1</sup> | N4  | C25 | C24              | 95.15(9)    |
| C9  | N2  | C20 | C17 | -1.59(17)   | C26 <sup>1</sup> | N4  | C26 | O3               | -177.02(14) |
| C9  | C10 | C11 | C12 | 177.98(12)  | C26 <sup>1</sup> | N4  | C26 | C27              | 3.00(8)     |
| C9  | C10 | C18 | C17 | 0.81(18)    | C26              | C27 | C28 | C27 <sup>1</sup> | 3.16(8)     |
| C9  | C10 | C18 | C19 | -178.77(11) | C26              | C27 | C28 | C29              | -176.84(8)  |
| C10 | C11 | C12 | C13 | 0.1(2)      | C26              | C27 | C32 | C31              | 179.92(12)  |
| C10 | C18 | C19 | C13 | 1.46(18)    | C27              | C28 | C29 | C30              | -3.83(8)    |
| C10 | C18 | C19 | C14 | -179.09(11) | C27              | C28 | C29 | C30 <sup>1</sup> | 176.17(8)   |
| C11 | C10 | C18 | C17 | 179.43(12)  | C27 <sup>1</sup> | C28 | C29 | C30 <sup>1</sup> | -3.83(8)    |
| C11 | C10 | C18 | C19 | -0.15(19)   | C27 <sup>1</sup> | C28 | C29 | C30              | 176.17(8)   |
| C11 | C12 | C13 | C19 | 1.3(2)      | C28              | C27 | C32 | C31              | 0.56(19)    |
| C12 | C13 | C19 | C14 | 178.54(13)  | C28              | C29 | C30 | C31              | 2.16(14)    |
| C12 | C13 | C19 | C18 | -2.03(19)   | C29              | C30 | C31 | C32              | 0.9(2)      |
| C14 | C15 | C16 | C17 | 0.3(2)      | C30 <sup>1</sup> | C29 | C30 | C31              | -177.84(14) |
| C15 | C14 | C19 | C13 | 179.12(13)  | C30              | C31 | C32 | C27              | -2.3(2)     |
| C15 | C14 | C19 | C18 | -0.30(19)   | C32              | C27 | C28 | C27 <sup>1</sup> | -177.49(14) |
| C15 | C16 | C17 | C18 | 0.74(19)    | C32              | C27 | C28 | C29              | 2.51(14)    |
| C15 | C16 | C17 | C20 | -179.44(12) |                  |     |     |                  |             |

<sup>1</sup>1-X,+Y,3/2-Z

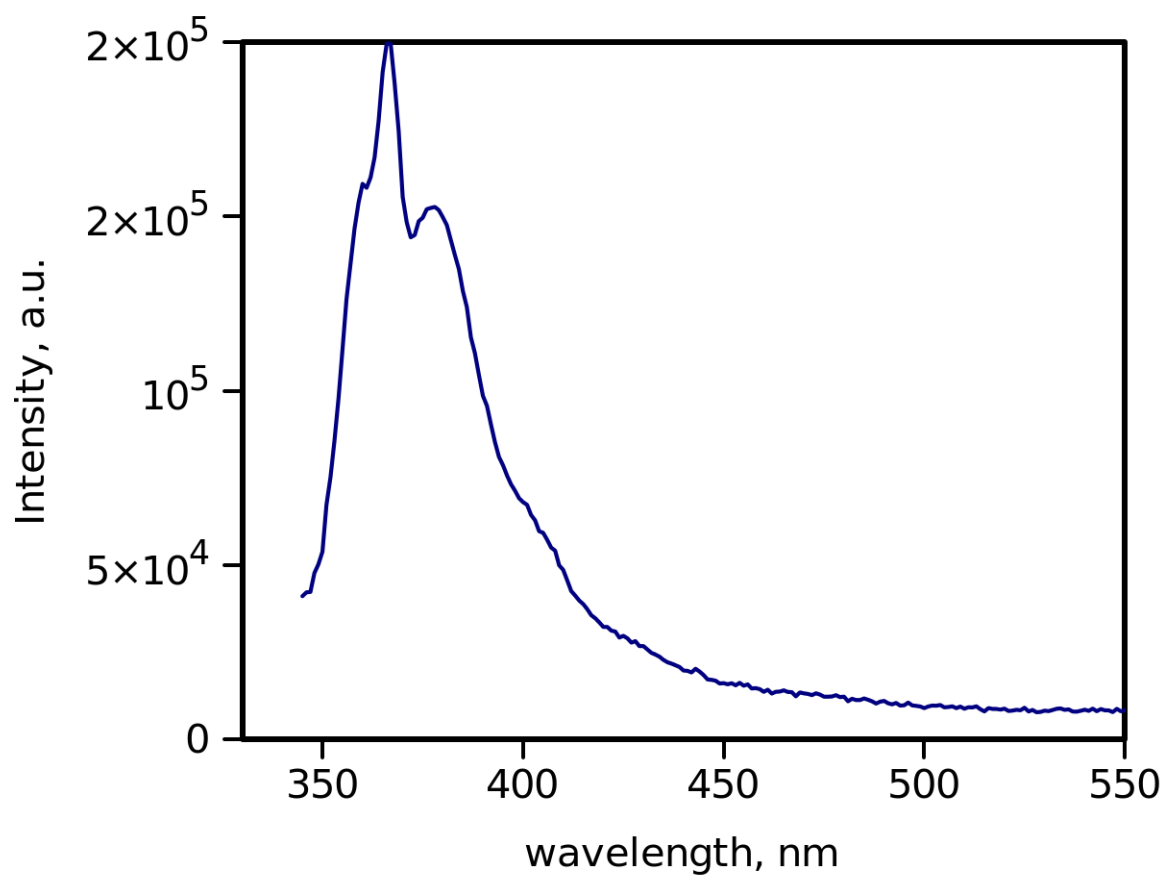

**S1.** Emission spectrum of **DMIM** in chloroform. Excitation wavelength was 330 nm.

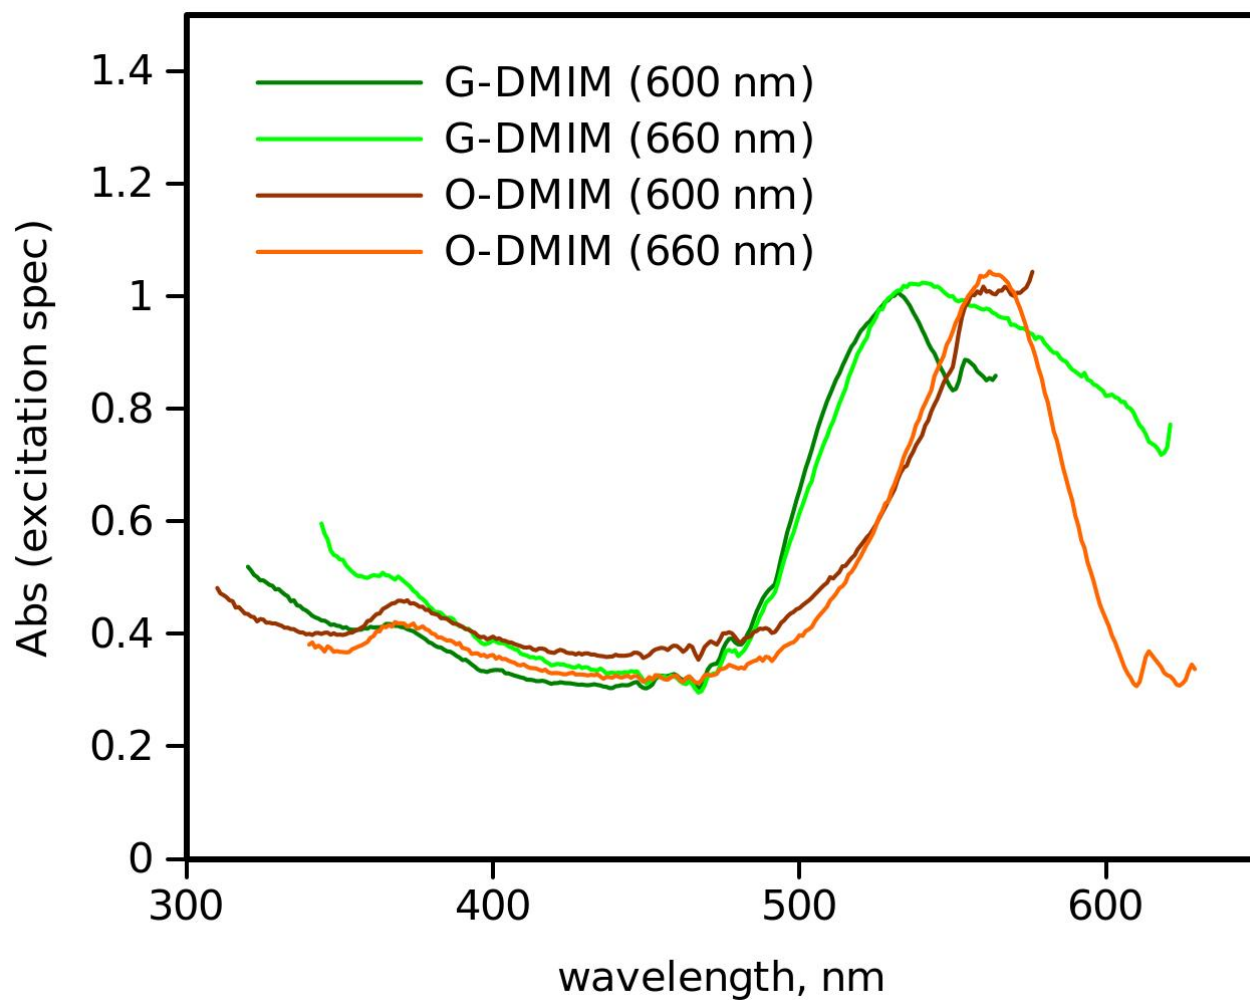

S2. Excitation spectra of **G-DMIM** and **O-DMIM** recorded with monitoring at 600 and 660 nm, and normalized at 530 nm (**G-DMIM**) and 560 nm (**O-DMIM**).

Green Crystal

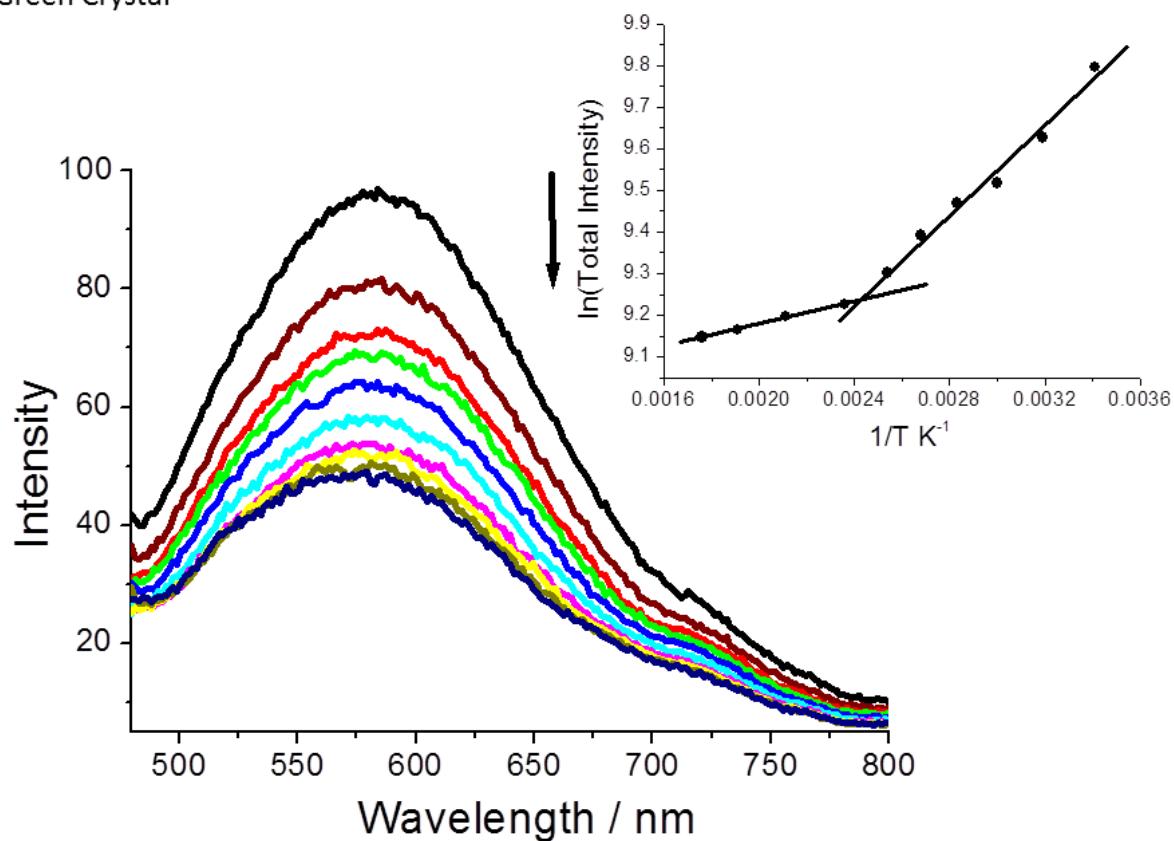

**S3.** Alteration in fluorescence spectra for **G-DMIM** dispersed in a dry KBr disc with temperature. Insert shows the plot of  $\ln(\text{total intensity})$  vs  $1/T$  with lines drawn to help show the break in dependence at around 417K.

Orange Crystal

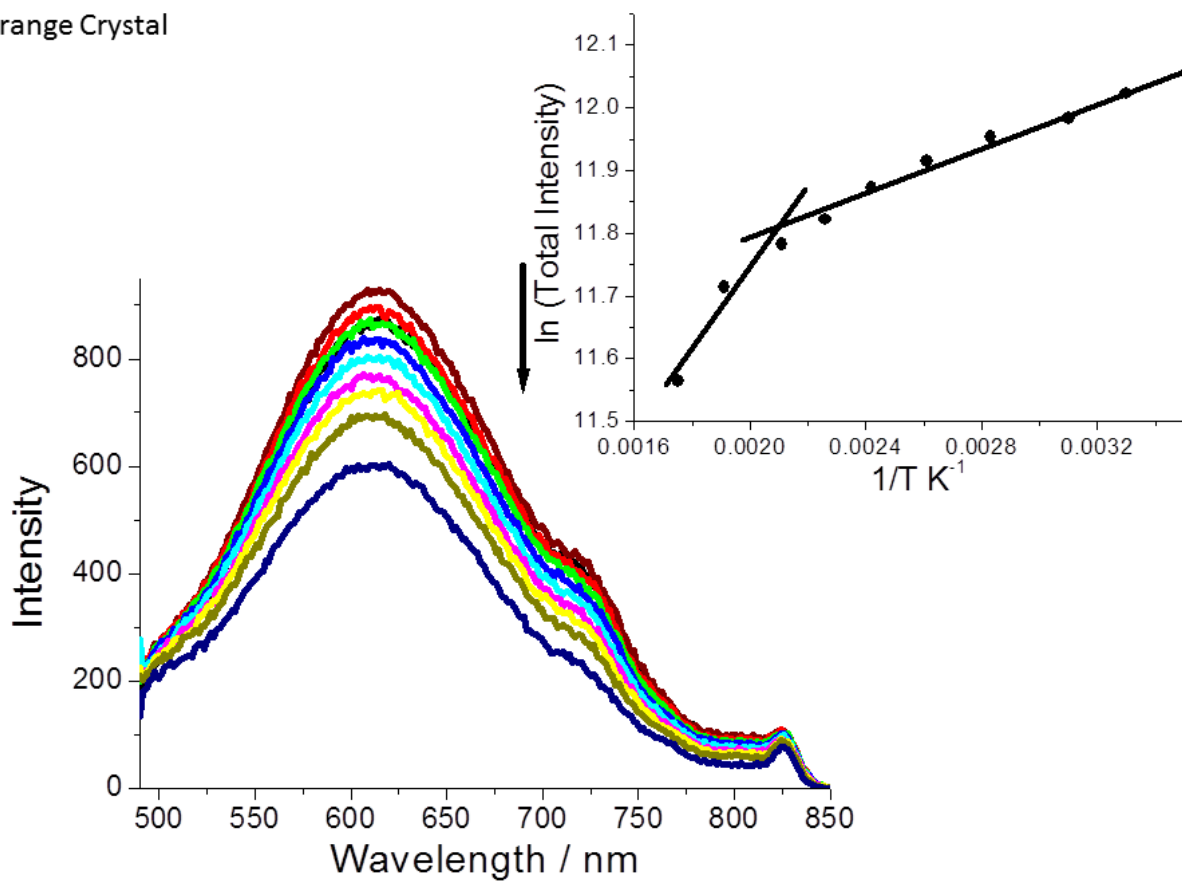

S4. Alteration in fluorescence spectra for **O-DMIM** dispersed in a dry KBr disc with temperature. Insert shows the plot of  $\ln(\text{total intensity})$  vs  $1/T$  with lines drawn to help show the break in dependence at around 476K.



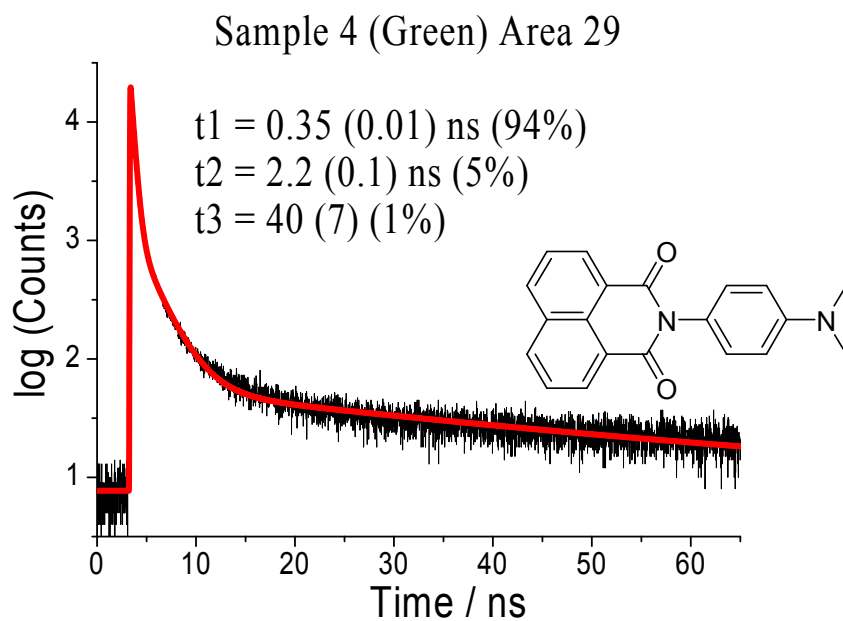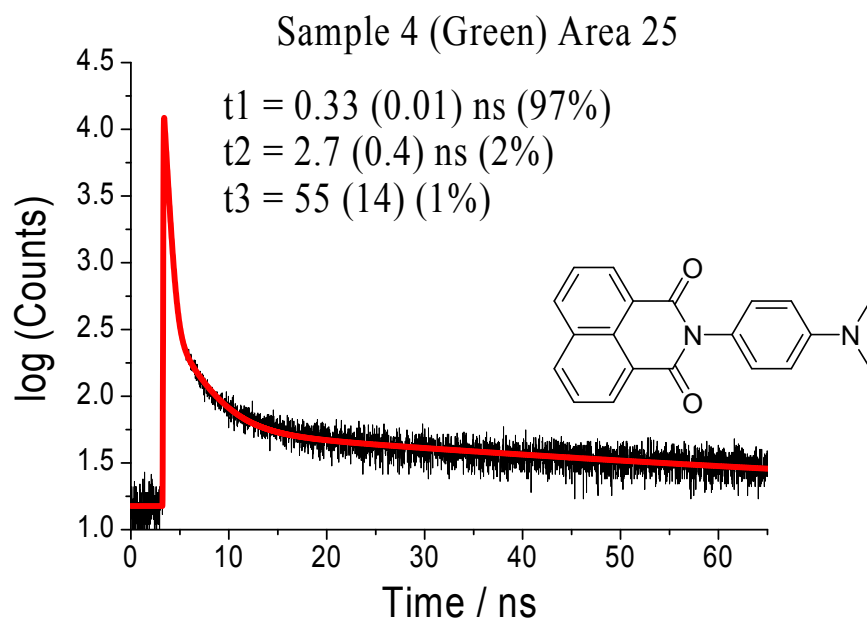

**S5.** Room temperature emission decay curves recorded for **G-DMIM** and the least-squares fit to a tri-exponential (red line).

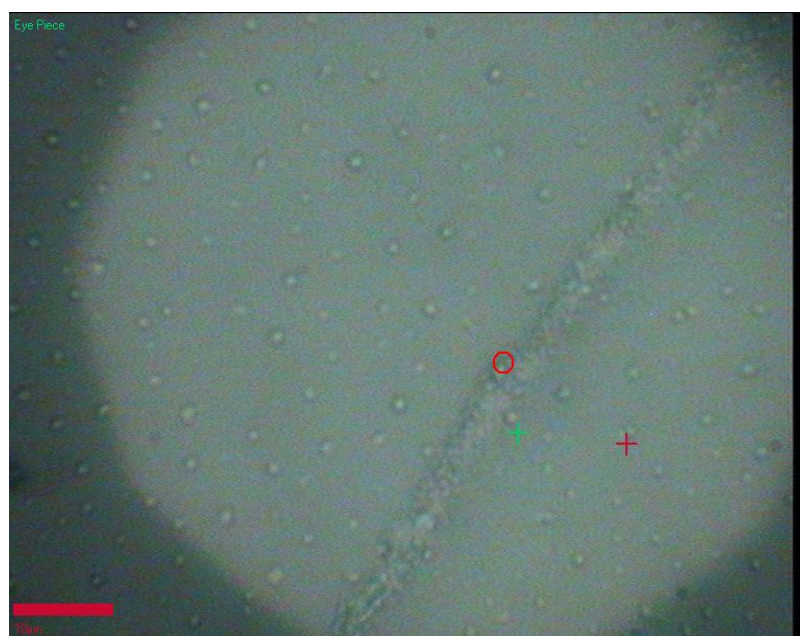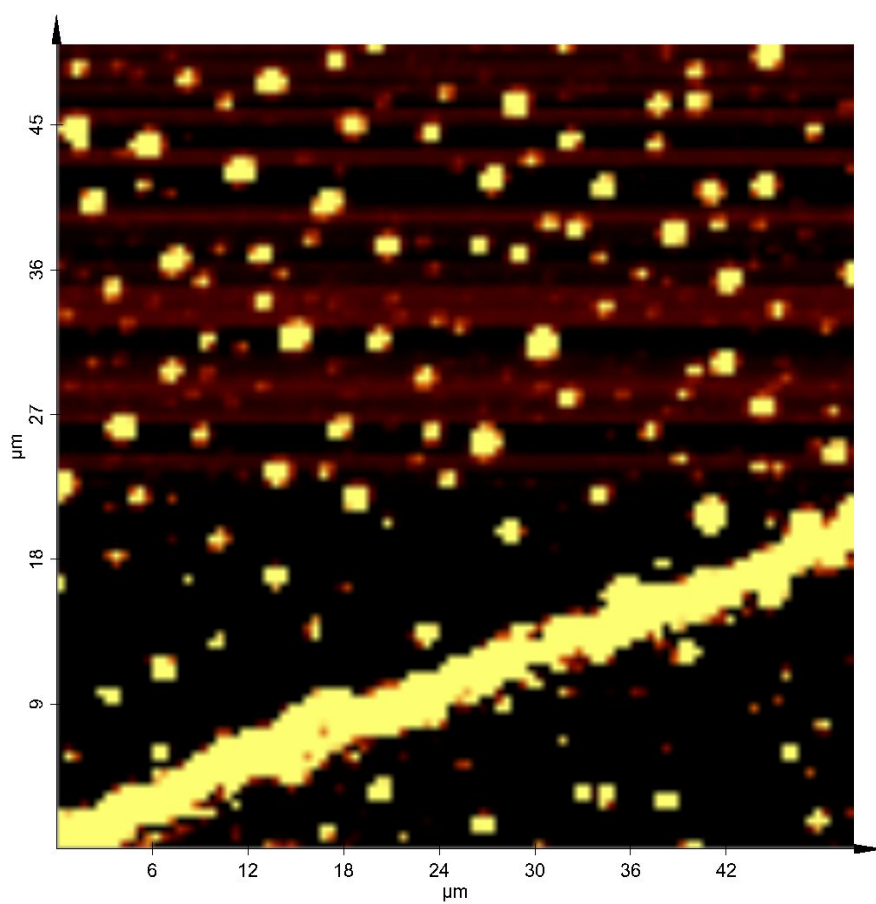

**S6.** Fluorescence microscope images of crystals for **DMIM** deposited on a glass slide after slow solvent evaporation. (top) before excitation, (bottom) after excitation.

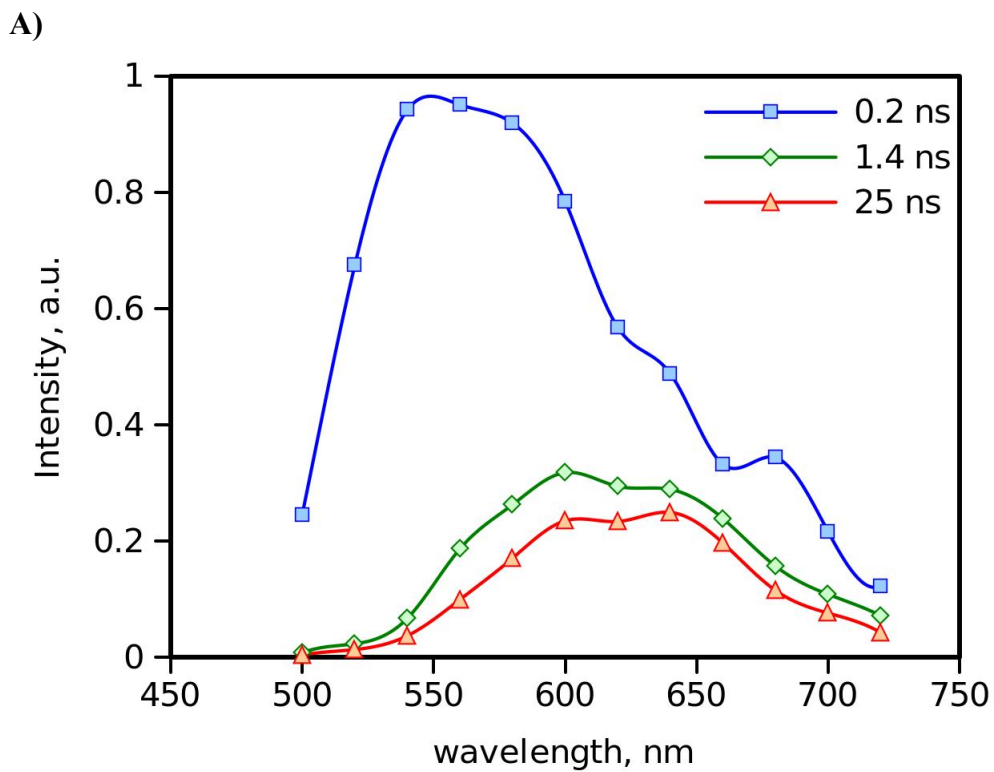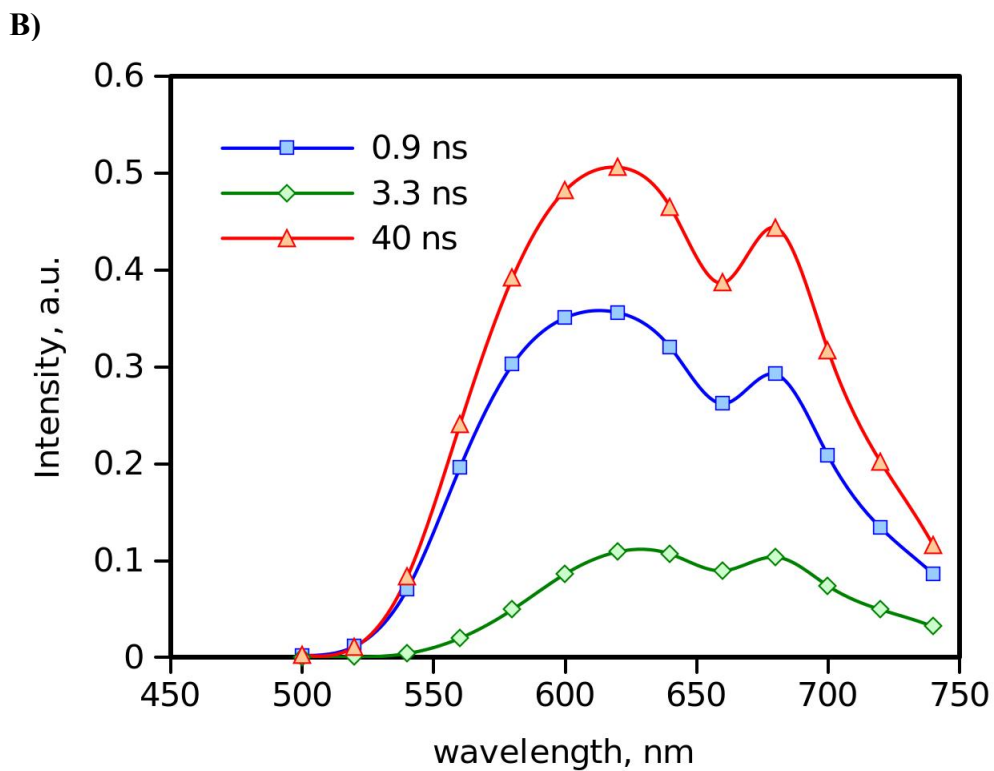

S7. Emission decay associated spectra of **G-DMIM** (A) and **O-DMIM** (B) normalized to present relative contribution of each component to the steady state emission spectrum. Normalization is done by multiplying each spectra component by the component lifetime,  $\tau_i \cdot A_i(\lambda)$ .

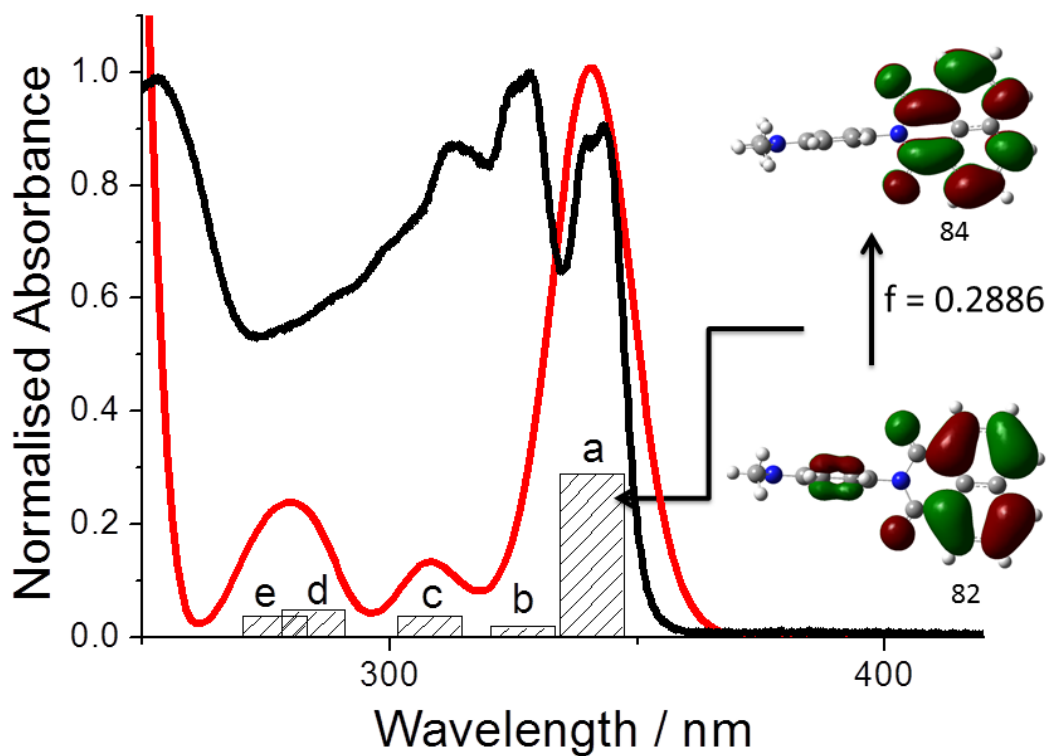

**S8.** Observed electronic absorption spectrum for **DMIM** in cyclohexane (black) and TD-DFT calculated spectrum (red) using B3LYP and a 6-311G<sup>+</sup>(3df) basis set. The shaded bars (a) through (e) represent electronic transitions contributing to the absorption profile. The insert shows the atomic orbitals associated with (a) and the oscillator strength.

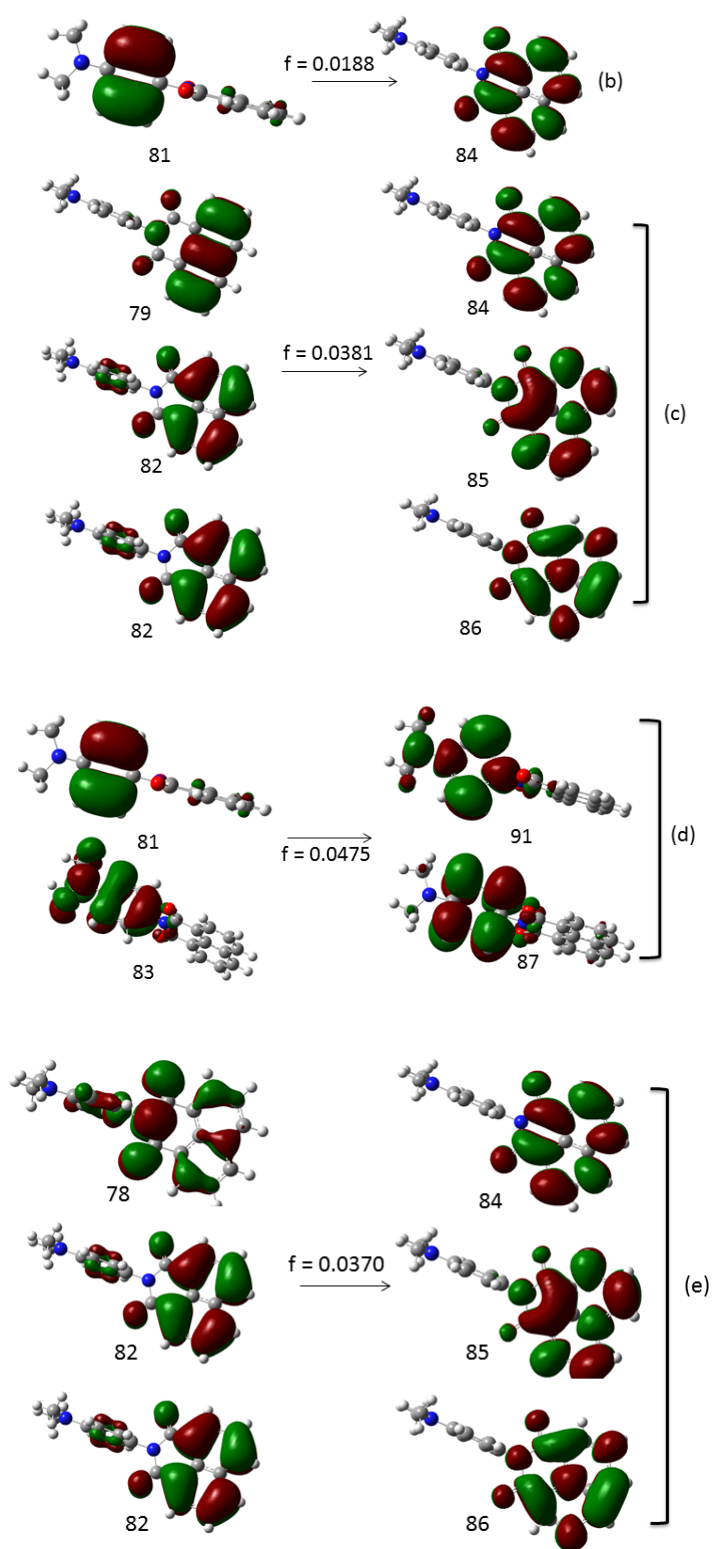

**S9.** Selection of atomic orbital associated with the electronic transitions (b) through (e) as shown in S5.

## Calculations

Emission spectra were fitted to semi-quantum Marcus theory given by [19]

$$I(\nu) = c\nu^3 \sum_{n=0}^{\infty} \frac{S^n}{n!} \exp\left(-\frac{(\Delta G + \lambda + nE_\nu + h\nu)^2}{4\lambda kT}\right)$$

where  $c$  is a constant,  $\nu$  is the emission frequency,  $\Delta G$  is the free energy,  $\lambda$  is the outer sphere reorganization energy,  $E_\nu$  is the vibrational energy, and  $S$  is the electron-vibrational coupling. The latter can also be expressed as function of the internal reorganization energy,  $\lambda_{in}$ , as  $S = \lambda_{in} / E_\nu$ .

If we assume a simple Marcus behaviour then the rate constant for non-radiative decay is given by:

$$k = A \exp(-(\Delta G + \lambda)^2 / 4\lambda)$$

### For G-DMIM

$$\Delta G = 2.873 \text{ eV} \quad \text{and} \quad \lambda = 0.40 + (0.132 \times 2.47)$$

$$k_g = A \exp(-(-2.873 + 0.73)^2 / 2.92)$$

$$= A \exp(-3.60 / 2.92) = A \exp(-1.23) = 0.29A$$

### For O-DMIM

$$\Delta G = 2.463 \text{ eV} \quad \text{and} \quad \lambda = 0.40 + (0.132 \times 0.38)$$

$$k_o = A \exp(-(-2.463 + 0.45)^2 / 1.8)$$

$$= A \exp(-4.05 / 1.8) = A \exp(-2.25) = 0.11A$$

If we assume  $A$  is constant then:

$$k_g / k_o = 2.64$$

NB: The assumption of classic ET theory is not quite valid as in the two examples we deal with the inverted region, in which classic theory does not work well. A second problem is that in classic theory  $\lambda$  is the total reorganization energy, which is taken as the sum of outer sphere and internal reorganization energies. In semi-quantum theory these two values are separated. The outer sphere reorganization is  $\lambda$  as it is given in equation above and the internal is included in  $S$ , and in “classic” approximation of single mode is  $\lambda_{in} = E_\nu S$ .
